# Supplementary material for: A Systematic Evaluation of Interneuron Morphology Representations for Cell Type Discrimination
Source: PubMed Central journal article supplement (PMC7498503; doi:10.1007/s12021-020-09461-z), 2020-05-04

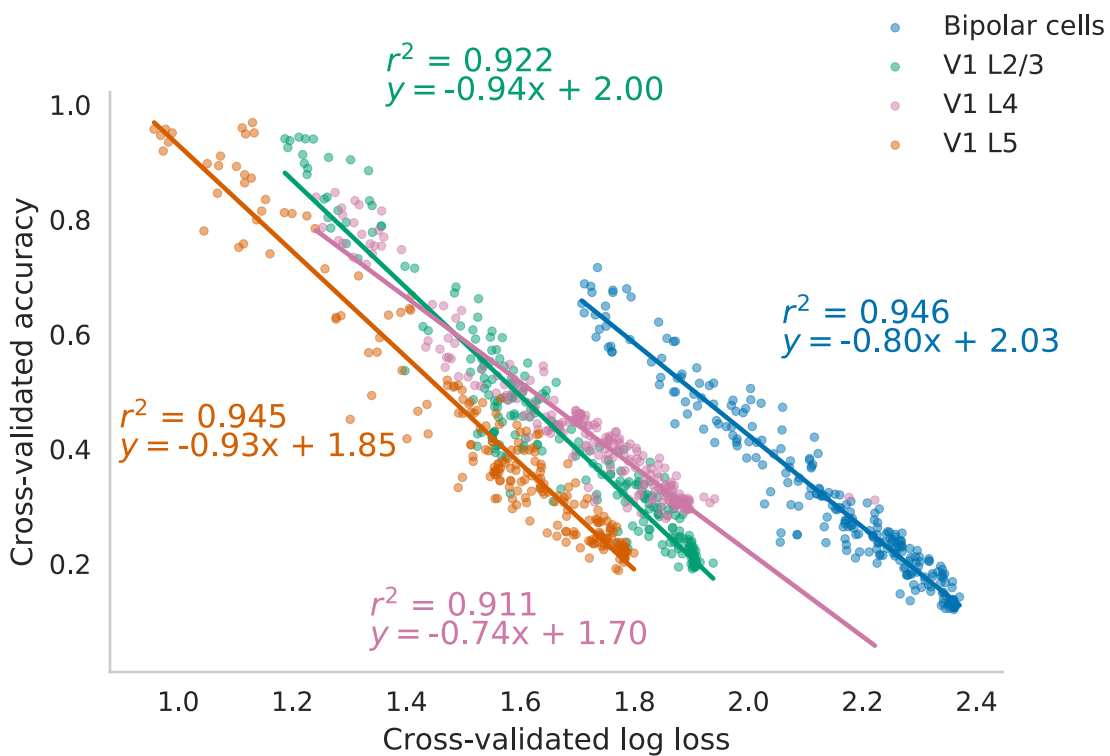

Supplement: 12021_2020_9461_MOESM4_ESM.pdf [file 12021_2020_9461_MOESM4_ESM.pdf]
