# Supplementary material for: A Systematic Evaluation of Interneuron Morphology Representations for Cell Type Discrimination
Source: PubMed Central journal article supplement (PMC7498503; doi:10.1007/s12021-020-09461-z), 2020-05-04

**Bipolar cells**

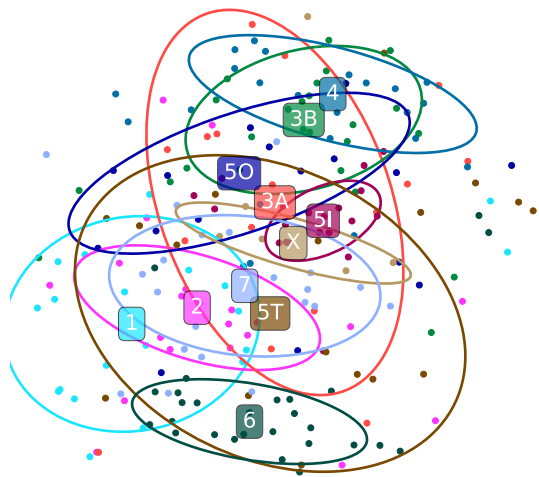

**V1 Layer 2/3**

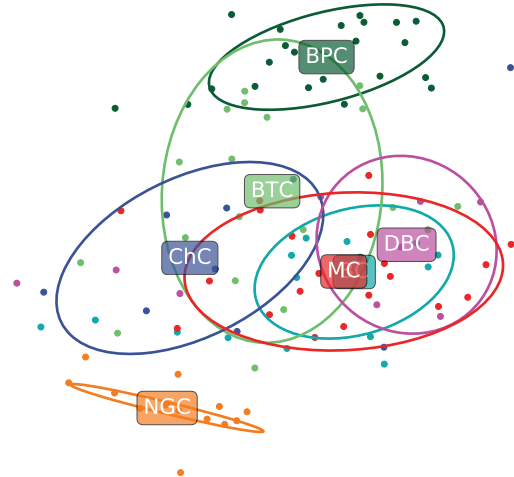

**V1 Layer 4**

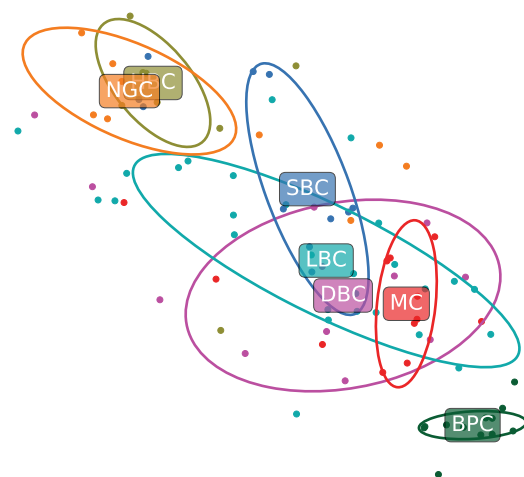

**V1 Layer 5**

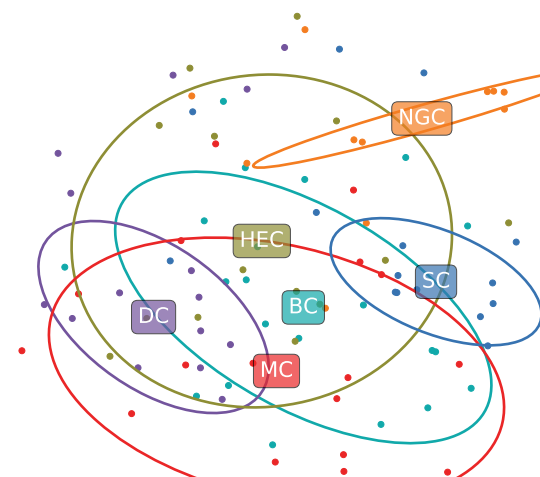

Supplement: 12021_2020_9461_MOESM5_ESM.pdf [file 12021_2020_9461_MOESM5_ESM.pdf]
